# Supplementary material for: Effect of oxygen termination on the interaction of first row transition metals with M2C MXenes and the feasibility of single-atom catalysts
Source: Royal Society of Chemistry journal article supplement (doi:10.1039/d1ta10252d), 2022-01-01
Supplement: d1ta10252d1.pdf [file d1ta10252d1.pdf]

## Effect of Oxygen Termination on the Interaction of First Row Transition Metals with $M_2C$ MXenes and the Feasibility of Single-Atom Catalysts†

Masoomeh Keyhanian,<sup>1,2</sup> Davood Farmanzadeh,<sup>2</sup> Ángel Morales-García<sup>1,\*</sup>  
Francesc Illas,<sup>1</sup>

<sup>1</sup>*Departament de Ciència de Materials i Química Física & Institut de Química Teòrica i Computacional (IQTCUB), Universitat de Barcelona, c/Martí i Franquès 1-11, 08028 Barcelona, Spain*

<sup>2</sup>Department of Physical Chemistry, Faculty of Chemistry, University of Mazandaran, Babolsar 47416-95447, Iran

\*[angel.morales@ub.edu](mailto:angel.morales@ub.edu)

### Contents

**Table S1.** Adsorption energy, structural parameters, charges, difference between the adsorption energy and the cohesive energy, and barrier energies of  $M@Ti_2CO_2$ .

**Table S2.** Adsorption energy, structural parameters, charges, difference between the adsorption energy and the cohesive energy, and barrier energies of  $M@Zr_2CO_2$ .

**Table S3.** Adsorption energy, structural parameters, charges, difference between the adsorption energy and the cohesive energy, and barrier energies of  $M@Hf_2CO_2$ .

**Table S4.** Adsorption energy, structural parameters, charges, difference between the adsorption energy and the cohesive energy, and barrier energies of  $M@V_2CO_2$ .

**Table S5.** Adsorption energy, structural parameters, charges, difference between the adsorption energy and the cohesive energy, and barrier energies of  $M@Nb_2CO_2$ .

**Table S6.** Adsorption energy, structural parameters, charges, difference between the adsorption energy and the cohesive energy, and barrier energies of  $M@Ta_2CO_2$ .

**Table S7.** Adsorption energy, structural parameters, charges, difference between the adsorption energy and the cohesive energy, and barrier energies of  $M@Cr_2CO_2$ .

**Table S8.** Adsorption energy, structural parameters, charges, difference between the adsorption energy and the cohesive energy, and barrier energies of  $M@Mo_2CO_2$ .

**Table S9.** Adsorption energy, structural parameters, charges, difference between the adsorption energy and the cohesive energy, and barrier energies of  $M@W_2CO_2$ .

**Table S10.** Linear trends of the  $E_{ads}(TM@M_2C)$  vs.  $E_{ads}(TM@M_2CO_2)$ .

**Table S11.** Electronic configurations of transition metals.

**Table S12.** Electronegativity of transition metal

**Table S1.** PBE and PBE-D3 calculated results for adatom on  $\text{Ti}_2\text{CO}_2$  (0001) surface including the adsorption site, and adsorption energy,  $E_{\text{ads}}$ . The vertical distance between the adatom and the O-terminated MXene surface is labeled by  $h$ .  $\Delta Q$  corresponds to the metal adatoms net charge, and the difference between  $E_{\text{ads}}$  and  $E_{\text{coh}}$ , and the diffusion barriers of TM adatoms on MXenes are labeled by  $E_{\text{diff}}$  and  $E_{\text{bar}}$ , respectively. Note that the rows in bold that correspond to PBE-D3 are included in all Figures.

| Adatom |               | site                 | $E_{\text{ads}}$ (eV) | $h$ (Å)      | $\Delta Q$ (e) | $E_{\text{diff}}$ | $E_{\text{bar}}$ |
|--------|---------------|----------------------|-----------------------|--------------|----------------|-------------------|------------------|
| Sc     | PBE           | <b>H<sub>C</sub></b> | <b>-6.292</b>         | <b>1.023</b> | <b>1.816</b>   | <b>2.17</b>       |                  |
|        | <b>PBE-D3</b> |                      | <b>-6.666</b>         | <b>1.019</b> | <b>1.814</b>   |                   | <b>1.55</b>      |
|        | PBE           | H <sub>e</sub>       | -5.689                | 1.123        | 1.786          |                   |                  |
|        | <b>PBE-D3</b> |                      | <b>-6.045</b>         | <b>1.123</b> | <b>1.784</b>   |                   |                  |
|        | PBE           | T                    | -2.962                | 1.835        | 1.179          |                   |                  |
|        | <b>PBE-D3</b> |                      | <b>-3.289</b>         | <b>1.832</b> | <b>1.170</b>   |                   |                  |
| Ti     | <b>PBE</b>    | <b>H<sub>C</sub></b> | <b>-6.072</b>         | <b>0.802</b> | <b>1.743</b>   | <b>0.62</b>       |                  |
|        | <b>PBE-D3</b> |                      | <b>-6.479</b>         | <b>0.796</b> | <b>1.738</b>   |                   | <b>1.60</b>      |
|        | PBE           | H <sub>e</sub>       | -5.524                | 0.901        | 1.716          |                   |                  |
|        | <b>PBE-D3</b> |                      | <b>-5.909</b>         | <b>0.901</b> | <b>1.718</b>   |                   |                  |
|        | PBE           | T                    | -2.917                | 1.832        | 1.038          |                   |                  |
| V      | <b>PBE</b>    | <b>H<sub>C</sub></b> | <b>-5.348</b>         | <b>0.765</b> | <b>1.508</b>   | <b>-0.68</b>      |                  |
|        | <b>PBE-D3</b> |                      | <b>-5.736</b>         | <b>0.756</b> | <b>1.506</b>   |                   | <b>1.38</b>      |
|        | PBE           | H <sub>e</sub>       | -4.681                | 1.073        | 1.459          |                   |                  |
|        | <b>PBE-D3</b> |                      | <b>-5.036</b>         | <b>1.072</b> | <b>1.461</b>   |                   |                  |
| Cr     | <b>PBE</b>    | <b>H<sub>C</sub></b> | <b>-2.443</b>         | <b>0.985</b> | <b>1.220</b>   | <b>-1.56</b>      |                  |
|        | <b>PBE-D3</b> |                      | <b>-3.046</b>         | <b>0.960</b> | <b>1.236</b>   |                   | <b>0.38</b>      |
|        | PBE           | H <sub>e</sub>       | -2.120                | 1.239        | 1.195          |                   |                  |
|        | <b>PBE-D3</b> |                      | <b>-2.848</b>         | <b>1.196</b> | <b>1.216</b>   |                   |                  |
|        | PBE           | T                    | -1.665                | 1.893        | 0.827          |                   |                  |
|        | <b>PBE-D3</b> |                      | <b>-2.256</b>         | <b>1.884</b> | <b>0.813</b>   |                   |                  |
| Mn     | <b>PBE</b>    | <b>H<sub>C</sub></b> | <b>-2.649</b>         | <b>1.042</b> | <b>1.410</b>   | <b>-1.21</b>      |                  |
|        | <b>PBE-D3</b> |                      | <b>-3.024</b>         | <b>1.027</b> | <b>1.411</b>   |                   | <b>0.57</b>      |
|        | PBE           | H <sub>e</sub>       | -2.300                | 1.156        | 1.336          |                   |                  |
|        | <b>PBE-D3</b> |                      | <b>-2.673</b>         | <b>1.157</b> | <b>1.336</b>   |                   |                  |
|        | PBE           | T                    | -1.490                | 1.926        | 0.858          |                   |                  |
|        | <b>PBE-D3</b> |                      | <b>-1.799</b>         | <b>1.922</b> | <b>0.871</b>   |                   |                  |
| Fe     | <b>PBE</b>    | <b>H<sub>C</sub></b> | <b>-3.181</b>         | <b>0.732</b> | <b>1.048</b>   | <b>-1.69</b>      |                  |
|        | <b>PBE-D3</b> |                      | <b>-3.461</b>         | <b>0.728</b> | <b>1.056</b>   |                   | <b>0.86</b>      |
|        | PBE           | H <sub>e</sub>       | -2.407                | 1.034        | 1.078          |                   |                  |
|        | <b>PBE-D3</b> |                      | <b>-2.775</b>         | <b>1.033</b> | <b>1.228</b>   |                   |                  |
| Co     | <b>PBE</b>    | <b>H<sub>C</sub></b> | <b>-3.100</b>         | <b>0.756</b> | <b>0.932</b>   | <b>-2.17</b>      |                  |
|        | <b>PBE-D3</b> |                      | <b>-3.394</b>         | <b>0.748</b> | <b>0.925</b>   |                   | <b>0.73</b>      |
|        | PBE           | H <sub>e</sub>       | -2.543                | 1.045        | 0.962          |                   |                  |
|        | <b>PBE-D3</b> |                      | <b>-2.855</b>         | <b>1.045</b> | <b>0.964</b>   |                   |                  |
|        | PBE           | T                    | -1.520                | 1.796        | 0.684          |                   |                  |
|        | <b>PBE-D3</b> |                      | <b>-1.622</b>         | <b>1.771</b> | <b>0.661</b>   |                   |                  |
| Ni     | <b>PBE</b>    | <b>H<sub>C</sub></b> | <b>-2.992</b>         | <b>0.684</b> | <b>0.672</b>   | <b>-1.88</b>      |                  |

|    |               |                      |               |              |              |              |
|----|---------------|----------------------|---------------|--------------|--------------|--------------|
|    | <b>PBE-D3</b> |                      | <b>-3.331</b> | <b>0.674</b> | <b>0.674</b> | <b>0.82</b>  |
|    | PBE           | H <sub>e</sub>       | -2.240        | 1.065        | 0.786        |              |
|    | <b>PBE-D3</b> |                      | <b>-2.610</b> | <b>1.090</b> | <b>0.810</b> |              |
|    | PBE           | T                    | -1.754        | 1.763        | 0.605        |              |
|    | <b>PBE-D3</b> |                      | <b>-2.046</b> | <b>1.756</b> | <b>0.553</b> |              |
| Cu | <b>PBE</b>    | <b>H<sub>C</sub></b> | <b>-1.585</b> | <b>0.991</b> | <b>0.790</b> | <b>-1.90</b> |
|    | <b>PBE-D3</b> |                      | <b>-1.938</b> | <b>0.960</b> | <b>0.795</b> | <b>0.28</b>  |
|    | PBE           | H <sub>e</sub>       | -1.332        | 1.231        | 0.795        |              |
|    | <b>PBE-D3</b> |                      | <b>-1.686</b> | <b>1.228</b> | <b>0.793</b> |              |
|    | PBE           | T                    | -1.109        | 1.828        | 0.618        |              |
|    | <b>PBE-D3</b> |                      | <b>-1.402</b> | <b>1.824</b> | <b>0.578</b> |              |
| Zn | PBE           | B                    | -0.026        | 3.323        | 0.030        |              |
|    | <b>PBE</b>    | <b>H<sub>C</sub></b> | <b>-0.030</b> | <b>3.218</b> | <b>0.042</b> | <b>-1.09</b> |
|    | <b>PBE-D3</b> |                      | <b>-0.373</b> | <b>2.620</b> | <b>0.102</b> | <b>0.03</b>  |
|    | PBE           | H <sub>e</sub>       | -0.027        | 3.228        | 0.036        |              |
|    | <b>PBE-D3</b> |                      | <b>-0.341</b> | <b>2.715</b> | <b>0.057</b> |              |
|    | PBE           | T                    | -0.027        | 3.374        | 0.033        |              |
|    | <b>PBE-D3</b> |                      | <b>-0.328</b> | <b>2.796</b> | <b>0.070</b> |              |

**Table S2.** Same as Table S1 for Zr<sub>2</sub>CO<sub>2</sub> (0001) surface.

| Adatom |               | site                 | E <sub>ads</sub> (eV) | h (Å)        | ΔQ (e)       | E <sub>diff</sub> | E <sub>bar</sub> |
|--------|---------------|----------------------|-----------------------|--------------|--------------|-------------------|------------------|
| Sc     | PBE           | <b>H<sub>C</sub></b> | <b>-4.835</b>         | <b>0.986</b> | <b>1.780</b> | <b>0.72</b>       |                  |
|        | <b>PBE-D3</b> |                      | <b>-5.155</b>         | <b>0.983</b> | <b>1.773</b> |                   | <b>1.44</b>      |
|        | PBE           | H <sub>e</sub>       | -4.194                | 1.084        | 1.696        |                   |                  |
|        | <b>PBE-D3</b> |                      | <b>-4.505</b>         | <b>1.085</b> | <b>1.692</b> |                   |                  |
|        | PBE           | T                    | -2.151                | 1.878        | 1.043        |                   |                  |
|        | <b>PBE-D3</b> |                      | <b>-2.436</b>         | <b>1.875</b> | <b>1.049</b> |                   |                  |
| Ti     | <b>PBE</b>    | <b>H<sub>C</sub></b> | <b>-4.696</b>         | <b>0.782</b> | <b>1.620</b> | <b>-0.75</b>      |                  |
|        | <b>PBE-D3</b> |                      | <b>-5.048</b>         | <b>0.779</b> | <b>1.613</b> |                   | <b>1.66</b>      |
|        | PBE           | H <sub>e</sub>       | -4.001                | 0.866        | 1.661        |                   |                  |
|        | <b>PBE-D3</b> |                      | <b>-4.335</b>         | <b>0.868</b> | <b>1.662</b> |                   |                  |
|        | PBE           | T                    | -2.295                | 1.883        | 0.892        |                   |                  |
|        | <b>PBE-D3</b> |                      | <b>-2.483</b>         | <b>1.823</b> | <b>0.943</b> |                   |                  |
| V      | PBE           | B                    | -2.428                | 1.784        | 0.773        |                   |                  |
|        | <b>PBE-D3</b> |                      | <b>-2.730</b>         | <b>1.793</b> | <b>0.772</b> |                   |                  |
|        | <b>PBE</b>    | <b>H<sub>C</sub></b> | <b>-4.147</b>         | <b>0.709</b> | <b>1.353</b> | <b>-1.88</b>      |                  |
|        | <b>PBE-D3</b> |                      | <b>-4.495</b>         | <b>0.714</b> | <b>1.360</b> |                   | <b>1.50</b>      |
|        | PBE           | H <sub>e</sub>       | -3.352                | 1.055        | 1.374        |                   |                  |
|        | <b>PBE-D3</b> |                      | <b>-3.670</b>         | <b>1.055</b> | <b>1.375</b> |                   |                  |
|        | PBE           | T                    | -2.418                | 1.892        | 0.776        |                   |                  |
|        | <b>PBE-D3</b> |                      | <b>-2.708</b>         | <b>1.891</b> | <b>0.726</b> |                   |                  |
| Cr     | <b>PBE</b>    | <b>H<sub>C</sub></b> | <b>-1.607</b>         | <b>1.006</b> | <b>1.046</b> | <b>-2.39</b>      |                  |
|        | <b>PBE-D3</b> |                      | <b>-2.092</b>         | <b>0.972</b> | <b>1.062</b> |                   | <b>0.54</b>      |
|        | PBE           | T                    | -1.133                | 1.920        | 0.752        |                   |                  |
|        | <b>PBE-D3</b> |                      | <b>-1.624</b>         | <b>1.915</b> | <b>0.735</b> |                   |                  |
| Mn     | <b>PBE</b>    | <b>H<sub>C</sub></b> | <b>-1.675</b>         | <b>0.949</b> | <b>1.310</b> | <b>-2.19</b>      |                  |
|        | <b>PBE-D3</b> |                      | <b>-2.012</b>         | <b>0.928</b> | <b>1.300</b> |                   | <b>0.61</b>      |
|        | PBE           | H <sub>e</sub>       | -1.240                | 1.130        | 1.236        |                   |                  |

|    |               |                      |               |              |               |              |             |
|----|---------------|----------------------|---------------|--------------|---------------|--------------|-------------|
|    | PBE-D3        |                      | -1.580        | 1.133        | 1.234         |              |             |
|    | PBE           | T                    | -0.943        | 1.954        | 0.739         |              |             |
|    | PBE-D3        |                      | -1.220        | 1.953        | 0.749         |              |             |
| Fe | <b>PBE</b>    | <b>H<sub>C</sub></b> | <b>-2.479</b> | <b>0.695</b> | 0.872         | <b>-2.39</b> |             |
|    | <b>PBE-D3</b> |                      | <b>-2.732</b> | <b>0.689</b> | 0.865         |              | <b>1.15</b> |
|    | PBE           | H <sub>e</sub>       | -1.362        | 1.067        | 1.102         |              |             |
|    | PBE-D3        |                      | -1.675        | 1.028        | 1.103         |              |             |
|    | PBE           | T                    | -0.982        | 1.861        | 0.562         |              |             |
|    | PBE-D3        |                      | -1.255        | 1.856        | 0.559         |              |             |
| Co | <b>PBE</b>    | <b>H<sub>C</sub></b> | <b>-2.496</b> | <b>0.694</b> | <b>0.749</b>  | <b>-2.77</b> |             |
|    | <b>PBE-D3</b> |                      | <b>-2.763</b> | <b>0.692</b> | <b>0.744</b>  |              | <b>0.96</b> |
|    | PBE           | H <sub>e</sub>       | -1.625        | 1.064        | 0.865         |              |             |
|    | PBE-D3        |                      | -1.916        | 1.066        | 0.860         |              |             |
|    | PBE           | T                    | -1.112        | 1.842        | 0.508         |              |             |
|    | PBE-D3        |                      | -1.376        | 1.836        | 0.509         |              |             |
| Ni | PBE           | B                    | -1.483        | 1.396        | 0.463         |              |             |
|    | <b>PBE</b>    | <b>H<sub>C</sub></b> | <b>-2.589</b> | <b>0.653</b> | <b>0.509</b>  | <b>-2.28</b> |             |
|    | <b>PBE-D3</b> |                      | <b>-2.898</b> | <b>0.646</b> | <b>0.508</b>  |              | <b>1.20</b> |
|    | PBE           | T                    | -1.418        | 1.770        | 0.369         |              |             |
|    | PBE-D3        |                      | -1.690        | 1.767        | 0.389         |              |             |
| Cu | <b>PBE</b>    | <b>H<sub>C</sub></b> | <b>-1.101</b> | <b>0.893</b> | <b>0.700</b>  | <b>-2.38</b> |             |
|    | <b>PBE-D3</b> |                      | <b>-1.422</b> | <b>0.873</b> | <b>0.697</b>  |              | <b>0.59</b> |
|    | PBE           | T                    | -0.702        | 1.866        | 0.411         |              |             |
|    | PBE-D3        |                      | -0.966        | 1.864        | 0.425         |              |             |
| Zn | PBE           | B                    | -0.025        | 3.592        | -0.030        |              |             |
|    | <b>PBE</b>    | <b>H<sub>C</sub></b> | <b>-0.029</b> | <b>3.462</b> | <b>-0.025</b> | <b>-1.09</b> |             |
|    | <b>PBE-D3</b> |                      | <b>-0.334</b> | <b>2.711</b> | <b>0.025</b>  |              | <b>0.02</b> |
|    | PBE           | H <sub>e</sub>       | -0.028        | 3.429        | -0.025        |              |             |
|    | PBE-D3        |                      | -0.313        | 2.803        | 0.012         |              |             |
|    | PBE           | T                    | -0.022        | 3.665        | -0.028        |              |             |
|    | PBE-D3        |                      | -0.280        | 2.961        | 0.015         |              |             |

**Table S3.** Same as Table S1 for Hf<sub>2</sub>CO<sub>2</sub> (0001) surface.

| Adatom |               | site                 | E <sub>ads</sub> (eV) | h (Å)        | ΔQ (e)       | E <sub>diff</sub> | E <sub>bar</sub> |
|--------|---------------|----------------------|-----------------------|--------------|--------------|-------------------|------------------|
| Sc     | PBE           | <b>H<sub>C</sub></b> | <b>-3.799</b>         | <b>1.005</b> | <b>1.704</b> | <b>-0.32</b>      |                  |
|        | <b>PBE-D3</b> |                      | <b>-4.092</b>         | <b>1.001</b> | <b>1.700</b> |                   | <b>1.15</b>      |
|        | PBE           | H <sub>e</sub>       | -3.293                | 1.136        | 1.566        |                   |                  |
|        | PBE-D3        |                      | -3.557                | 1.136        | 1.564        |                   |                  |
|        | PBE           | T                    | -1.701                | 1.922        | 0.964        |                   |                  |
|        | PBE-D3        |                      | -1.960                | 1.919        | 0.971        |                   |                  |
| Ti     | <b>PBE</b>    | <b>H<sub>C</sub></b> | <b>-3.768</b>         | <b>0.883</b> | <b>1.434</b> | <b>-1.68</b>      |                  |
|        | <b>PBE-D3</b> |                      | <b>-4.098</b>         | <b>0.880</b> | <b>1.427</b> |                   | <b>1.39</b>      |
|        | PBE           | H <sub>e</sub>       | -2.948                | 0.912        | 1.550        |                   |                  |
|        | PBE-D3        |                      | -3.238                | 0.912        | 1.551        |                   |                  |
|        | PBE           | T                    | -1.937                | 1.923        | 0.816        |                   |                  |
|        | PBE-D3        |                      | -2.021                | 1.866        | 0.883        |                   |                  |
| V      | <b>PBE</b>    | <b>H<sub>C</sub></b> | <b>-3.343</b>         | <b>0.760</b> | <b>1.235</b> | <b>-2.69</b>      |                  |
|        | <b>PBE-D3</b> |                      | <b>-3.667</b>         | <b>0.755</b> | <b>1.223</b> |                   | <b>1.33</b>      |

|    |               |                      |               |              |               |              |             |
|----|---------------|----------------------|---------------|--------------|---------------|--------------|-------------|
|    | PBE           | H <sub>e</sub>       | -2.634        | 1.113        | 1.330         |              |             |
|    | PBE-D3        |                      | -2.913        | 1.112        | 1.327         |              |             |
|    | PBE           | T                    | -2.149        | 1.949        | 0.639         |              |             |
|    | PBE-D3        |                      | -2.423        | 1.941        | 0.664         |              |             |
| Cr | <b>PBE</b>    | <b>H<sub>C</sub></b> | <b>-1.120</b> | <b>1.121</b> | <b>0.990</b>  | <b>-2.88</b> |             |
|    | <b>PBE-D3</b> |                      | <b>-1.534</b> | <b>1.089</b> | <b>0.991</b>  |              | <b>0.47</b> |
|    | PBE           | H <sub>e</sub>       | -0.714        | 1.425        | 0.963         |              |             |
|    | PBE           | T                    | -0.856        | 1.967        | 0.611         |              |             |
|    | PBE-D3        |                      | -1.219        | 1.962        | 0.632         |              |             |
| Mn | <b>PBE</b>    | <b>H<sub>C</sub></b> | <b>-1.069</b> | <b>0.932</b> | <b>1.174</b>  | <b>-2.79</b> |             |
|    | <b>PBE-D3</b> |                      | <b>-1.397</b> | <b>0.916</b> | <b>1.159</b>  |              | <b>0.51</b> |
|    | PBE           | H <sub>e</sub>       | -0.721        | 1.170        | 1.160         |              |             |
|    | PBE-D3        |                      | -1.023        | 1.170        | 1.146         |              |             |
|    | PBE           | T                    | -0.665        | 1.996        | 0.673         |              |             |
|    | PBE-D3        |                      | -1.226        | 1.156        | 1.200         |              |             |
| Fe | PBE           | B                    | -0.744        | 1.745        | 0.516         |              |             |
|    | PBE-D3        |                      | -0.892        | 1.764        | 0.502         |              |             |
|    | <b>PBE</b>    | <b>H<sub>C</sub></b> | <b>-2.008</b> | <b>0.743</b> | <b>0.773</b>  | <b>-2.86</b> |             |
|    | <b>PBE-D3</b> |                      | <b>-2.257</b> | <b>0.739</b> | <b>0.771</b>  |              | <b>1.14</b> |
|    | PBE           | H <sub>e</sub>       | -0.896        | 1.135        | 1.011         |              |             |
|    | PBE-D3        |                      | -1.939        | 0.797        | 0.912         |              |             |
|    | PBE           | T                    | -0.739        | 1.912        | 0.477         |              |             |
| Co | <b>PBE</b>    | <b>H<sub>C</sub></b> | <b>-2.064</b> | <b>0.735</b> | <b>0.639</b>  | <b>-3.21</b> |             |
|    | <b>PBE-D3</b> |                      | <b>-2.359</b> | <b>0.744</b> | <b>0.638</b>  |              | <b>0.91</b> |
|    | PBE           | H <sub>e</sub>       | -1.246        | 1.121        | 0.835         |              |             |
|    | PBE-D3        |                      | -1.516        | 1.123        | 0.835         |              |             |
|    | PBE           | T                    | -0.882        | 1.889        | 0.440         |              |             |
|    | PBE-D3        |                      | -1.141        | 1.883        | 0.428         |              |             |
| Ni | <b>PBE</b>    | <b>H<sub>C</sub></b> | <b>-2.245</b> | <b>0.707</b> | <b>0.441</b>  | <b>-2.63</b> |             |
|    | <b>PBE-D3</b> |                      | <b>-2.555</b> | <b>0.701</b> | <b>0.438</b>  |              | <b>1.14</b> |
|    | PBE           | T                    | -1.213        | 1.786        | 0.402         |              |             |
|    | PBE-D3        |                      | -1.481        | 1.778        | 0.419         |              |             |
| Cu | <b>PBE</b>    | <b>H<sub>C</sub></b> | <b>-0.724</b> | <b>1.786</b> | <b>0.694</b>  | <b>-2.76</b> |             |
|    | <b>PBE-D3</b> |                      | <b>-1.044</b> | <b>1.778</b> | <b>0.691</b>  |              | <b>0.42</b> |
|    | PBE           | H <sub>e</sub>       | -0.302        | 1.786        | 0.723         |              |             |
|    | PBE-D3        |                      | -0.622        | 1.778        | 0.720         |              |             |
|    | PBE           | T                    | -0.505        | 1.900        | 0.387         |              |             |
|    | PBE-D3        |                      | -0.767        | 1.895        | 0.365         |              |             |
| Zn | PBE           | B                    | -0.032        | 3.601        | -0.039        |              |             |
|    | PBE           | H <sub>C</sub>       | -0.031        | 3.445        | 0.005         | -1.09        |             |
|    | <b>PBE-D3</b> |                      | <b>-0.332</b> | <b>2.805</b> | <b>0.021</b>  |              | <b>0.03</b> |
|    | <b>PBE</b>    | <b>H<sub>e</sub></b> | <b>-0.039</b> | <b>3.520</b> | <b>-0.037</b> |              |             |
|    | PBE-D3        |                      | -0.311        | 2.838        | 0.040         |              |             |
|    | PBE           | T                    | -0.031        | 3.713        | -0.037        |              |             |
|    | PBE-D3        |                      | -0.281        | 3.038        | -0.002        |              |             |

**Table S4.** Same as Table S1 for V<sub>2</sub>CO<sub>2</sub> (0001) surface.

| Adatom | site | E <sub>ads</sub> (eV) | h (Å) | ΔQ (e) | E <sub>diff</sub> | E <sub>bar</sub> |
|--------|------|-----------------------|-------|--------|-------------------|------------------|
|--------|------|-----------------------|-------|--------|-------------------|------------------|

|    |        |                |               |              |              |              |             |
|----|--------|----------------|---------------|--------------|--------------|--------------|-------------|
| Sc | PBE    | H <sub>C</sub> | <b>-7.887</b> | <b>1.025</b> | <b>1.852</b> | <b>3.77</b>  |             |
|    | PBE-D3 |                | <b>-8.298</b> | <b>1.018</b> | <b>1.846</b> |              | <b>1.36</b> |
|    | PBE    | H <sub>e</sub> | -7.488        | 1.142        | 1.833        |              |             |
|    | PBE-D3 |                | -7.874        | 1.141        | 1.830        |              |             |
| Ti | PBE    | H <sub>C</sub> | <b>-7.668</b> | <b>0.712</b> | <b>1.930</b> | <b>2.22</b>  |             |
|    | PBE-D3 |                | <b>-8.120</b> | <b>0.704</b> | <b>1.928</b> |              | <b>1.74</b> |
|    | PBE    | H <sub>e</sub> | -7.313        | 0.899        | 1.860        |              |             |
|    | PBE-D3 |                | -7.725        | 0.899        | 1.857        |              |             |
| V  | PBE    | H <sub>C</sub> | <b>-6.601</b> | <b>0.664</b> | <b>1.680</b> | <b>0.57</b>  |             |
|    | PBE-D3 |                | <b>-7.021</b> | <b>0.655</b> | <b>1.673</b> |              | <b>1.20</b> |
|    | PBE    | H <sub>e</sub> | -6.387        | 0.974        | 1.598        |              |             |
|    | PBE-D3 |                | -6.767        | 0.971        | 1.602        |              |             |
| Cr | PBE    | H <sub>C</sub> | <b>-3.664</b> | <b>0.852</b> | <b>1.474</b> | <b>-0.34</b> |             |
|    | PBE-D3 |                | <b>-4.307</b> | <b>0.788</b> | <b>1.465</b> |              | <b>1.26</b> |
|    | PBE    | H <sub>e</sub> | -3.511        | 1.043        | 1.428        |              |             |
|    | PBE-D3 |                | -4.248        | 1.005        | 1.441        |              |             |
|    | PBE    | T              | -2.511        | 1.882        | 0.938        |              |             |
| Mn | PBE    | H <sub>C</sub> | <b>-3.845</b> | <b>1.119</b> | <b>1.485</b> | <b>-0.01</b> |             |
|    | PBE-D3 |                | <b>-4.241</b> | <b>1.107</b> | <b>1.488</b> |              | <b>0.55</b> |
|    | PBE    | H <sub>e</sub> | -3.686        | 1.205        | 1.455        |              |             |
|    | PBE-D3 |                | -4.076        | 1.202        | 1.452        |              |             |
| Fe | PBE    | H <sub>C</sub> | <b>-3.813</b> | <b>0.908</b> | <b>1.373</b> | <b>-1.06</b> |             |
|    | PBE-D3 |                | <b>-4.210</b> | <b>0.904</b> | <b>1.372</b> |              | <b>1.34</b> |
|    | PBE    | H <sub>e</sub> | -3.703        | 1.020        | 1.359        |              |             |
|    | PBE-D3 |                | -4.094        | 1.018        | 1.357        |              |             |
| Co | PBE    | H <sub>C</sub> | -3.196        | 0.571        | 0.878        |              |             |
|    | PBE-D3 |                | -3.522        | 0.558        | 0.873        |              |             |
|    | PBE    | H <sub>e</sub> | <b>-3.751</b> | <b>1.021</b> | <b>1.073</b> | <b>-1.52</b> |             |
|    | PBE-D3 |                | <b>-4.080</b> | <b>1.020</b> | <b>1.074</b> |              | <b>0.63</b> |
| Ni | PBE    | H <sub>C</sub> | -3.145        | 1.043        | 1.035        |              |             |
|    | PBE-D3 |                | -3.481        | 0.999        | 1.026        |              |             |
|    | PBE    | H <sub>e</sub> | <b>-3.283</b> | <b>1.063</b> | <b>0.984</b> | <b>-1.59</b> |             |
|    | PBE-D3 |                | <b>-3.658</b> | <b>1.061</b> | <b>0.981</b> |              | <b>0.44</b> |
|    | PBE    | T              | -2.278        | 1.793        | 0.736        |              |             |
|    | PBE-D3 |                | -2.593        | 1.790        | 0.724        |              |             |
| Cu | PBE    | H <sub>C</sub> | -2.244        | 1.204        | 0.884        |              |             |
|    | PBE-D3 |                | -2.605        | 1.173        | 0.884        |              |             |
|    | PBE    | H <sub>e</sub> | <b>-2.264</b> | <b>1.235</b> | <b>0.877</b> | <b>-1.22</b> |             |
|    | PBE-D3 |                | <b>-2.635</b> | <b>1.231</b> | <b>0.875</b> |              | <b>0.11</b> |
|    | PBE    | T              | -1.845        | 1.821        | 0.738        |              |             |
|    | PBE-D3 |                | -2.160        | 1.818        | 0.723        |              |             |
| Zn | PBE    | H <sub>C</sub> | <b>-0.810</b> | <b>1.237</b> | <b>1.151</b> | <b>-0.31</b> |             |
|    | PBE-D3 |                | <b>-1.158</b> | <b>1.209</b> | <b>1.172</b> |              | <b>0.29</b> |
|    | PBE    | H <sub>e</sub> | -0.668        | 1.312        | 1.081        |              |             |
|    | PBE-D3 |                | -1.033        | 1.300        | 1.088        |              |             |
|    | PBE    | T              | -0.368        | 2.003        | 0.656        |              |             |
|    | PBE-D3 |                | -0.678        | 1.980        | 0.639        |              |             |

**Table S5.** Same as Table S1 for Nb<sub>2</sub>CO<sub>2</sub> (0001) surface.

| Adatom |               | site                 | $E_{\text{ads}}$ (eV) | $h$ (Å)       | $\Delta Q$ (e) | $E_{\text{diff}}$ | $E_{\text{bar}}$ |
|--------|---------------|----------------------|-----------------------|---------------|----------------|-------------------|------------------|
| Sc     | <b>PBE</b>    | <b>H<sub>C</sub></b> | <b>-6.324</b>         | <b>0.951</b>  | <b>1.825</b>   | <b>2.20</b>       |                  |
|        | <b>PBE-D3</b> |                      | <b>-6.836</b>         | <b>0.936</b>  | <b>1.815</b>   |                   | <b>1.26</b>      |
|        | PBE           | H <sub>e</sub>       | -5.856                | 1.094         | 1.778          |                   |                  |
|        | PBE-D3        |                      | -6.464                | 1.086         | 1.778          |                   |                  |
|        | PBE           | T                    | -3.155                | 1.860         | 1.166          |                   |                  |
|        | PBE-D3        |                      | -3.640                | 1.859         | 1.151          |                   |                  |
| Ti     | <b>PBE</b>    | <b>H<sub>C</sub></b> | <b>-6.051</b>         | <b>0.646</b>  | <b>1.738</b>   | <b>0.60</b>       |                  |
|        | <b>PBE-D3</b> |                      | <b>-6.576</b>         | <b>0.635</b>  | <b>1.733</b>   |                   | <b>1.49</b>      |
|        | PBE           | H <sub>e</sub>       | -5.628                | 0.857         | 1.751          |                   |                  |
|        | PBE-D3        |                      | -6.213                | 0.855         | 1.743          |                   |                  |
|        | PBE           | T                    | -3.058                | 1.822         | 1.055          |                   |                  |
|        | PBE-D3        |                      | -3.497                | 1.820         | 1.038          |                   |                  |
| V      | <b>PBE</b>    | <b>H<sub>C</sub></b> | <b>-5.230</b>         | <b>0.669</b>  | <b>1.439</b>   | <b>-0.80</b>      |                  |
|        | <b>PBE-D3</b> |                      | <b>-5.741</b>         | <b>0.646</b>  | <b>1.434</b>   |                   | <b>0.97</b>      |
|        | PBE           | H <sub>e</sub>       | -4.884                | 1.016         | 1.462          |                   |                  |
|        | PBE-D3        |                      | -5.465                | 1.007         | 1.469          |                   |                  |
|        | PBE           | T                    | -3.173                | 1.858         | 0.930          |                   |                  |
|        | PBE-D3        |                      | -3.639                | 1.854         | 0.934          |                   |                  |
| Cr     | <b>PBE</b>    | <b>H<sub>C</sub></b> | <b>-2.460</b>         | <b>-2.460</b> | <b>1.226</b>   | <b>-1.54</b>      |                  |
|        | <b>PBE-D3</b> |                      | <b>-2.889</b>         | <b>-2.889</b> | <b>1.224</b>   |                   | <b>0.27</b>      |
|        | PBE           | H <sub>e</sub>       | -2.264                | -2.264        | 1.187          |                   |                  |
|        | PBE-D3        |                      | -2.708                | -2.708        | 1.187          |                   |                  |
|        | PBE           | T                    | -1.849                | -1.849        | 0.845          |                   |                  |
| Mn     | <b>PBE</b>    | <b>H<sub>C</sub></b> | <b>-2.779</b>         | <b>1.028</b>  | <b>1.419</b>   | <b>-1.08</b>      |                  |
|        | <b>PBE-D3</b> |                      | <b>-3.286</b>         | <b>1.009</b>  | <b>1.409</b>   |                   | <b>0.44</b>      |
|        | PBE           | H <sub>e</sub>       | -2.504                | 1.163         | 1.362          |                   |                  |
|        | PBE-D3        |                      | -3.120                | 1.133         | 1.349          |                   |                  |
|        | PBE           | T                    | -1.722                | 1.931         | 0.904          |                   |                  |
|        | PBE-D3        |                      | -2.205                | 1.922         | 0.867          |                   |                  |
| Fe     | <b>PBE</b>    | <b>H<sub>C</sub></b> | <b>-2.928</b>         | <b>0.663</b>  | <b>1.021</b>   | <b>-1.94</b>      |                  |
|        | <b>PBE-D3</b> |                      | <b>-3.298</b>         | <b>0.648</b>  | <b>1.013</b>   |                   | <b>0.31</b>      |
|        | PBE           | H <sub>e</sub>       | -2.561                | 1.037         | 1.231          |                   |                  |
|        | PBE-D3        |                      | -3.181                | 1.010         | 1.214          |                   |                  |
|        | PBE           | T                    | -1.538                | 1.868         | 0.771          |                   |                  |
|        | PBE-D3        |                      | -2.011                | 1.852         | 0.783          |                   |                  |
| Co     | <b>PBE</b>    | <b>H<sub>C</sub></b> | <b>-2.986</b>         | <b>0.743</b>  | <b>0.905</b>   | <b>-2.28</b>      |                  |
|        | <b>PBE-D3</b> |                      | <b>-3.418</b>         | <b>0.742</b>  | <b>0.905</b>   |                   | <b>0.38</b>      |
|        | PBE           | H <sub>e</sub>       | -2.748                | 1.019         | 0.966          |                   |                  |
|        | PBE-D3        |                      | -3.294                | 0.993         | 0.946          |                   |                  |
|        | PBE           | T                    | -1.512                | 1.798         | 0.667          |                   |                  |
|        | PBE-D3        |                      | -2.156                | 1.803         | 0.707          |                   |                  |
| Ni     | <b>PBE</b>    | <b>H<sub>C</sub></b> | <b>-2.826</b>         | <b>0.680</b>  | <b>0.623</b>   | <b>-2.04</b>      |                  |
|        | <b>PBE-D3</b> |                      | <b>-3.257</b>         | <b>0.660</b>  | <b>0.617</b>   |                   | <b>0.37</b>      |
|        | PBE           | H <sub>e</sub>       | -2.387                | 1.051         | 0.831          |                   |                  |
|        | PBE-D3        |                      | -2.995                | 1.016         | 0.810          |                   |                  |
|        | PBE           | T                    | -1.732                | 1.788         | 0.561          |                   |                  |
|        | PBE-D3        |                      | -2.161                | 1.775         | 0.597          |                   |                  |
| Cu     | <b>PBE</b>    | <b>H<sub>C</sub></b> | <b>-1.635</b>         | <b>1.037</b>  | <b>0.773</b>   | <b>-1.84</b>      |                  |
|        | <b>PBE-D3</b> |                      | <b>-2.108</b>         | <b>1.016</b>  | <b>0.774</b>   |                   | <b>0.03</b>      |



|    |               |                      |               |              |              |             |
|----|---------------|----------------------|---------------|--------------|--------------|-------------|
|    | PBE           | H <sub>e</sub>       | -1.517        | 1.215        | 0.791        |             |
|    | PBE-D3        |                      | -2.082        | 1.164        | 0.776        |             |
|    | PBE           | T                    | -1.277        | 1.837        | 0.553        |             |
|    | PBE-D3        |                      | -1.748        | 1.826        | 0.632        |             |
| Zn | PBE           | B                    | -0.056        | 2.732        | 0.135        | -1.06       |
|    | <b>PBE-D3</b> |                      | <b>-0.578</b> | <b>2.159</b> | <b>0.323</b> | <b>0.14</b> |
|    | PBE           | H <sub>C</sub>       | 0.033         | 1.419        | 0.817        |             |
|    | PBE-D3        |                      | -0.421        | 1.439        | 0.799        |             |
|    | <b>PBE</b>    | <b>H<sub>e</sub></b> | <b>-0.060</b> | <b>2.737</b> | <b>0.121</b> |             |
|    | PBE-D3        |                      | -0.557        | 2.255        | 0.236        |             |
|    | PBE           | T                    | -0.055        | 2.705        | 0.159        |             |
|    | PBE-D3        |                      | -0.577        | 2.210        | 0.318        |             |

**Table S6.** Same as Table S1 for Ta<sub>2</sub>CO<sub>2</sub> (0001) surface.

| Adatom |               | site                 | E <sub>ads</sub> (eV) | h (Å)        | ΔQ (e)       | E <sub>diff</sub> | E <sub>bar</sub> |
|--------|---------------|----------------------|-----------------------|--------------|--------------|-------------------|------------------|
| Sc     | <b>PBE</b>    | <b>H<sub>C</sub></b> | <b>-4.912</b>         | <b>0.929</b> | <b>1.741</b> | <b>0.79</b>       |                  |
|        | <b>PBE-D3</b> |                      | <b>-5.262</b>         | <b>0.922</b> | <b>1.736</b> |                   | <b>1.18</b>      |
|        | PBE           | H <sub>e</sub>       | -4.524                | 1.116        | 1.729        |                   |                  |
|        | PBE-D3        |                      | -4.832                | 1.115        | 1.723        |                   |                  |
|        | PBE           | T                    | -2.418                | 1.914        | 1.086        |                   |                  |
|        | PBE-D3        |                      | -2.720                | 1.910        | 1.092        |                   |                  |
| Ti     | <b>PBE</b>    | <b>H<sub>C</sub></b> | <b>-4.674</b>         | <b>0.674</b> | <b>1.566</b> | <b>-0.78</b>      |                  |
|        | <b>PBE-D3</b> |                      | <b>-5.059</b>         | <b>0.672</b> | <b>1.557</b> |                   | <b>1.48</b>      |
|        | PBE           | H <sub>e</sub>       | -4.098                | 0.938        | 1.658        |                   |                  |
|        | PBE-D3        |                      | -4.433                | 0.936        | 1.658        |                   |                  |
|        | PBE           | T                    | -2.374                | 1.867        | 0.989        |                   |                  |
|        | PBE-D3        |                      | -2.698                | 1.866        | 0.984        |                   |                  |
| V      | <b>PBE</b>    | <b>H<sub>C</sub></b> | <b>-4.086</b>         | <b>0.763</b> | <b>1.342</b> | <b>-1.94</b>      |                  |
|        | <b>PBE-D3</b> |                      | <b>-4.460</b>         | <b>0.753</b> | <b>1.341</b> |                   | <b>0.73</b>      |
|        | PBE           | H <sub>e</sub>       | -3.820                | 1.115        | 1.346        |                   |                  |
|        | PBE-D3        |                      | -4.149                | 1.115        | 1.348        |                   |                  |
|        | PBE           | T                    | -2.614                | 1.916        | 0.768        |                   |                  |
|        | PBE-D3        |                      | -2.927                | 1.910        | 0.792        |                   |                  |
| Cr     | <b>PBE</b>    | <b>H<sub>C</sub></b> | <b>-1.699</b>         | <b>1.213</b> | <b>1.078</b> | <b>-2.30</b>      |                  |
|        | <b>PBE-D3</b> |                      | <b>-2.189</b>         | <b>1.075</b> | <b>1.082</b> |                   | <b>0.11</b>      |
|        | PBE           | H <sub>e</sub>       | -1.584                | 1.357        | 1.061        |                   |                  |
|        | PBE-PBE       |                      | -2.093                | 1.346        | 1.070        |                   |                  |
|        | PBE           | T                    | -1.385                | 1.945        | 0.760        |                   |                  |
|        | PBE-D3        |                      | -1.803                | 1.938        | 0.785        |                   |                  |
| Mn     | <b>PBE</b>    | <b>H<sub>C</sub></b> | <b>-1.848</b>         | <b>1.100</b> | <b>1.359</b> | <b>-2.01</b>      |                  |
|        | <b>PBE-D3</b> |                      | <b>-2.227</b>         | <b>1.070</b> | <b>1.365</b> |                   | <b>0.36</b>      |
|        | PBE           | H <sub>e</sub>       | -1.699                | 1.247        | 1.247        |                   |                  |
|        | PBE-D3        |                      | -2.049                | 1.242        | 1.240        |                   |                  |
|        | PBE           | T                    | -1.224                | 1.981        | 0.826        |                   |                  |
|        | PBE-D3        |                      | -1.529                | 1.975        | 0.840        |                   |                  |
| Fe     | <b>PBE</b>    | <b>H<sub>C</sub></b> | <b>-2.274</b>         | <b>0.719</b> | <b>0.882</b> | <b>-2.60</b>      |                  |
|        | <b>PBE-D3</b> |                      | <b>-2.559</b>         | <b>0.714</b> | <b>0.880</b> |                   | <b>0.56</b>      |
|        | PBE           | H <sub>e</sub>       | -1.779                | 1.135        | 1.094        |                   |                  |
|        | PBE-D3        |                      | -2.136                | 1.138        | 1.091        |                   |                  |

|    |               |                      |               |              |              |              |             |
|----|---------------|----------------------|---------------|--------------|--------------|--------------|-------------|
|    | PBE           | T                    | -1.114        | 1.934        | 0.672        |              |             |
|    | PBE-D3        |                      | -1.381        | 1.948        | 0.706        |              |             |
| Co | <b>PBE</b>    | <b>H<sub>C</sub></b> | <b>-2.317</b> | <b>0.778</b> | <b>0.827</b> | <b>-2.95</b> |             |
|    | <b>PBE-D3</b> |                      | <b>-2.655</b> | <b>0.771</b> | <b>0.822</b> |              | <b>0.39</b> |
|    | PBE           | H <sub>e</sub>       | -2.132        | 1.085        | 0.875        |              |             |
|    | PBE-D3        |                      | -2.449        | 1.087        | 0.875        |              |             |
|    | PBE           | T                    | -1.238        | 1.853        | 0.643        |              |             |
|    | PBE-D3        |                      | -1.397        | 1.826        | 0.605        |              |             |
| Ni | <b>PBE</b>    | <b>H<sub>C</sub></b> | <b>-2.383</b> | <b>0.722</b> | <b>0.535</b> | <b>-2.49</b> |             |
|    | <b>PBE-D3</b> |                      | <b>-2.735</b> | <b>0.713</b> | <b>0.533</b> |              | <b>0.52</b> |
|    | PBE           | H <sub>e</sub>       | -1.887        | 1.115        | 0.709        |              |             |
|    | PBE-D3        |                      | -2.258        | 1.116        | 0.699        |              |             |
|    | PBE           | T                    | -1.377        | 1.804        | 0.532        |              |             |
|    | PBE-D3        |                      | -1.701        | 1.804        | 0.479        |              |             |
| Cu | PBE           | B                    | -0.961        | 1.773        | 0.588        |              |             |
|    | <b>PBE</b>    | <b>H<sub>C</sub></b> | <b>-1.165</b> | <b>1.179</b> | <b>0.750</b> | <b>-2.32</b> |             |
|    | <b>PBE-D3</b> |                      | <b>-1.518</b> | <b>1.138</b> | <b>0.749</b> |              | <b>0.11</b> |
|    | PBE           | H <sub>e</sub>       | -1.036        | 1.279        | 0.736        |              |             |
|    | PBE-D3        |                      | -1.462        | 1.274        | 0.738        |              |             |
|    | PBE           | T                    | -0.904        | 1.870        | 0.572        |              |             |
| Zn | PBE           | B                    | -0.031        | 3.181        | 0.056        |              |             |
|    | <b>PBE</b>    | <b>H<sub>C</sub></b> | <b>-0.034</b> | <b>3.125</b> | <b>0.062</b> | <b>-1.09</b> |             |
|    | <b>PBE-D3</b> |                      | <b>-0.405</b> | <b>2.583</b> | <b>0.128</b> |              | <b>0.02</b> |
|    | PBE           | H <sub>e</sub>       | -0.033        | 3.132        | 0.060        |              |             |
|    | PBE-D3        |                      | -0.386        | 2.574        | 0.126        |              |             |
|    | PBE           | T                    | -0.029        | 3.295        | 0.048        |              |             |
|    | PBE-D3        |                      | -0.366        | 2.678        | 0.127        |              |             |

**Table S7.** Same as Table S1 for Cr<sub>2</sub>CO<sub>2</sub> (0001) surface.

| Adatom |               | site                 | E <sub>ads</sub> (eV) | h (Å)        | ΔQ (e)       | E <sub>diff</sub> | E <sub>bar</sub> |
|--------|---------------|----------------------|-----------------------|--------------|--------------|-------------------|------------------|
| Sc     | PBE           | <b>E</b>             | <b>-8.787</b>         | <b>1.068</b> | <b>1.851</b> | <b>4.67</b>       |                  |
|        | PBE-D3        |                      | <b>-9.273</b>         | <b>1.061</b> | <b>1.853</b> |                   | <b>1.40</b>      |
|        | PBE           | H <sub>e</sub>       | -8.437                | 1.185        | 1.834        |                   |                  |
|        | PBE-D3        |                      | -9.008                | 1.177        | 1.839        |                   |                  |
| Ti     | <b>PBE</b>    | <b>E</b>             | <b>-8.154</b>         | <b>0.776</b> | <b>1.875</b> | <b>2.70</b>       |                  |
|        | <b>PBE-D3</b> |                      | <b>-8.693</b>         | <b>0.761</b> | <b>1.874</b> |                   | <b>2.00</b>      |
|        | PBE           | H <sub>e</sub>       | -7.801                | 0.940        | 1.854        |                   |                  |
|        | PBE-D3        |                      | -8.429                | 0.929        | 1.848        |                   |                  |
| V      | PBE           | E                    | -7.011                | 1.052        | 1.570        |                   |                  |
|        | PBE-D3        |                      | -7.444                | 1.037        | 1.573        |                   |                  |
|        | <b>PBE</b>    | <b>H<sub>e</sub></b> | <b>-7.177</b>         | <b>1.122</b> | <b>1.572</b> | <b>1.15</b>       |                  |
|        | <b>PBE-D3</b> |                      | <b>-7.700</b>         | <b>1.114</b> | <b>1.573</b> |                   | <b>0.98</b>      |
| Cr     | <b>PBE</b>    | <b>E</b>             | <b>-4.408</b>         | <b>1.133</b> | <b>1.416</b> | <b>0.41</b>       |                  |
|        | <b>PBE-D3</b> |                      | <b>-4.781</b>         | <b>1.116</b> | <b>1.411</b> |                   | <b>0.33</b>      |
|        | PBE           | H <sub>e</sub>       | -4.349                | 1.204        | 1.372        |                   |                  |
|        | PBE-PBE       |                      | -4.743                | 1.200        | 1.376        |                   |                  |
| Mn     | <b>PBE</b>    | <b>E</b>             | <b>-4.781</b>         | <b>1.182</b> | <b>1.501</b> | <b>0.92</b>       |                  |
|        | <b>PBE-D3</b> |                      | <b>-5.240</b>         | <b>1.175</b> | <b>1.507</b> |                   | <b>1.53</b>      |

|    |               |                      |               |              |              |              |             |
|----|---------------|----------------------|---------------|--------------|--------------|--------------|-------------|
|    | PBE           | H <sub>e</sub>       | -4.679        | 1.263        | 1.462        |              |             |
|    | PBE-D3        |                      | -5.224        | 1.239        | 1.476        |              |             |
| Fe | <b>PBE</b>    | <b>E</b>             | <b>-4.574</b> | <b>1.039</b> | <b>1.409</b> | <b>-0.30</b> |             |
|    | <b>PBE-D3</b> |                      | <b>-5.023</b> | <b>1.030</b> | <b>1.412</b> |              | <b>0.43</b> |
|    | PBE           | H <sub>e</sub>       | -4.484        | 1.176        | 1.369        |              |             |
|    | PBE-D3        |                      | -4.995        | 1.146        | 1.364        |              |             |
| Co | PBE           | E                    | -4.235        | 1.159        | 1.209        |              |             |
|    | PBE-D3        |                      | -4.615        | 1.159        | 1.201        |              |             |
|    | <b>PBE</b>    | <b>H<sub>e</sub></b> | <b>-4.474</b> | <b>1.172</b> | <b>1.162</b> | <b>-0.80</b> |             |
|    | <b>PBE-D3</b> |                      | <b>-4.947</b> | <b>1.153</b> | <b>1.151</b> |              | <b>1.30</b> |
| Ni | PBE           | E                    | -3.869        | 1.218        | 1.096        |              |             |
|    | PBE-D3        |                      | -4.306        | 1.215        | 1.097        |              |             |
|    | <b>PBE</b>    | <b>H<sub>e</sub></b> | <b>-3.946</b> | <b>1.204</b> | <b>1.066</b> | <b>-0.92</b> |             |
|    | <b>PBE-D3</b> |                      | <b>-4.459</b> | <b>1.173</b> | <b>1.071</b> |              | <b>1.23</b> |
| Cu | PBE           | E                    | -2.930        | 1.294        | 0.901        |              |             |
|    | PBE-D3        |                      | -3.356        | 1.297        | 0.904        |              |             |
|    | <b>PBE</b>    | <b>H<sub>e</sub></b> | <b>-2.956</b> | <b>1.296</b> | <b>0.888</b> | <b>-0.52</b> |             |
|    | <b>PBE-D3</b> |                      | <b>-3.429</b> | <b>1.259</b> | <b>0.900</b> |              | <b>0.16</b> |
|    | PBE           | T                    | -2.489        | 1.828        | 0.759        |              |             |
|    | PBE-D3        |                      | -2.903        | 1.819        | 0.775        |              |             |
| Zn | <b>PBE</b>    | <b>E</b>             | <b>-1.681</b> | <b>1.250</b> | <b>1.229</b> | <b>0.56</b>  |             |
|    | <b>PBE-D3</b> |                      | <b>-2.096</b> | <b>1.248</b> | <b>1.231</b> |              | <b>0.71</b> |
|    | PBE           | H <sub>e</sub>       | -1.609        | 1.303        | 1.186        |              |             |
|    | PBE-D3        |                      | -2.067        | 1.273        | 1.205        |              |             |

**Table S8.** Same as Table S1 for Mo<sub>2</sub>CO<sub>2</sub> (0001) surface.

| Adatom |               | site           | E <sub>ads</sub> (eV) | h (Å)        | ΔQ (e)       | E <sub>diff</sub> | E <sub>bar</sub> |
|--------|---------------|----------------|-----------------------|--------------|--------------|-------------------|------------------|
| Sc     | PBE           | <b>E</b>       | <b>-7.469</b>         | <b>0.942</b> | <b>1.816</b> | <b>3.35</b>       |                  |
|        | PBE-D3        |                | <b>-7.923</b>         | <b>0.928</b> | <b>1.816</b> |                   | <b>1.19</b>      |
|        | PBE           | H <sub>e</sub> | -7.066                | 1.128        | 1.778        |                   |                  |
|        | PBE-D3        |                | -7.609                | 0.928        | 1.781        |                   |                  |
| Ti     | <b>PBE</b>    | <b>E</b>       | <b>-6.963</b>         | <b>0.612</b> | <b>1.709</b> | <b>1.51</b>       |                  |
|        | <b>PBE-D3</b> |                | <b>-7.490</b>         | <b>0.593</b> | <b>1.701</b> |                   | <b>1.61</b>      |
|        | PBE           | H <sub>e</sub> | -6.441                | 0.866        | 1.782        |                   |                  |
|        | PBE-D3        |                | -7.048                | 0.855        | 1.798        |                   |                  |
|        | PBE           | T              | -3.855                | 1.836        | 1.164        |                   |                  |
|        | PBE-D3        |                | -4.399                | 1.862        | 1.276        |                   |                  |
| V      | <b>PBE</b>    | <b>E</b>       | <b>-5.936</b>         | <b>0.612</b> | <b>1.475</b> | <b>-0.09</b>      |                  |
|        | <b>PBE-D3</b> |                | <b>-6.403</b>         | <b>0.580</b> | <b>1.462</b> |                   | <b>0.89</b>      |
|        | PBE           | H <sub>e</sub> | -5.081                | 0.914        | 1.579        |                   |                  |
|        | PBE-D3        |                | -5.573                | 0.867        | 1.608        |                   |                  |
|        | PBE           | T              | -3.857                | 1.877        | 1.034        |                   |                  |
|        | PBE-D3        |                | -4.259                | 1.875        | 1.055        |                   |                  |
| Cr     | <b>PBE</b>    | <b>E</b>       | <b>-3.404</b>         | <b>1.054</b> | <b>1.308</b> | <b>-0.60</b>      |                  |
|        | <b>PBE-D3</b> |                | <b>-3.766</b>         | <b>1.010</b> | <b>1.290</b> |                   | <b>0.25</b>      |
|        | PBE           | H <sub>e</sub> | -3.261                | 1.219        | 1.250        |                   |                  |
|        | PBE-PBE       |                | -3.650                | 1.212        | 1.239        |                   |                  |
|        | PBE           | T              | -2.596                | 1.912        | 0.889        |                   |                  |
|        | PBE-D3        |                | -2.922                | 1.908        | 0.907        |                   |                  |

|    |               |                      |               |              |              |              |             |
|----|---------------|----------------------|---------------|--------------|--------------|--------------|-------------|
| Mn | <b>PBE</b>    | <b>E</b>             | <b>-3.817</b> | <b>1.067</b> | <b>1.463</b> | <b>-0.04</b> |             |
|    | <b>PBE-D3</b> |                      | <b>-4.250</b> | <b>1.054</b> | <b>1.466</b> |              | <b>0.45</b> |
|    | PBE           | H <sub>e</sub>       | -3.636        | 1.210        | 1.406        |              |             |
|    | PBE-D3        |                      | -4.160        | 1.183        | 1.410        |              |             |
|    | PBE           | T                    | -2.453        | 1.930        | 1.014        |              |             |
|    | PBE-D3        |                      | -2.879        | 1.922        | 1.008        |              |             |
| Fe | <b>PBE</b>    | <b>E</b>             | <b>-3.681</b> | <b>0.898</b> | <b>1.308</b> | <b>-1.19</b> |             |
|    | <b>PBE-D3</b> |                      | <b>-4.112</b> | <b>0.876</b> | <b>1.305</b> |              | <b>0.40</b> |
|    | PBE           | H <sub>e</sub>       | -3.445        | 1.102        | 1.275        |              |             |
|    | PBE-D3        |                      | -3.976        | 1.073        | 1.284        |              |             |
| Co | PBE           | E                    | -3.395        | 0.992        | 1.068        |              |             |
|    | PBE-D3        |                      | -3.766        | 0.971        | 1.070        |              |             |
|    | <b>PBE</b>    | <b>H<sub>e</sub></b> | <b>-3.573</b> | <b>1.112</b> | <b>1.052</b> | <b>-1.70</b> |             |
|    | <b>PBE-D3</b> |                      | <b>-4.032</b> | <b>1.088</b> | <b>1.056</b> |              | <b>0.47</b> |
|    | PBE           | T                    | -2.359        | 1.827        | 0.904        |              |             |
|    | PBE-D3        |                      | -2.624        | 1.829        | 0.854        |              |             |
| Ni | PBE           | E                    | -3.064        | 1.087        | 0.992        |              |             |
|    | PBE-D3        |                      | -3.475        | 1.079        | 0.994        |              |             |
|    | <b>PBE</b>    | <b>H<sub>e</sub></b> | <b>-3.081</b> | <b>1.128</b> | <b>0.941</b> | <b>-1.79</b> |             |
|    | <b>PBE-D3</b> |                      | <b>-3.591</b> | <b>1.095</b> | <b>0.948</b> |              | <b>0.34</b> |
|    | PBE           | T                    | -2.360        | 1.808        | 0.795        |              |             |
|    | PBE-D3        |                      | -2.786        | 1.804        | 0.739        |              |             |
| Cu | <b>PBE</b>    | <b>E</b>             | <b>-2.314</b> | <b>1.128</b> | <b>0.831</b> |              |             |
|    | PBE-D3        |                      | -2.725        | 1.132        | 0.829        |              |             |
|    | PBE           | H <sub>e</sub>       | -2.274        | 1.239        | 0.812        | -1.21        |             |
|    | <b>PBE-D3</b> |                      | <b>-2.752</b> | <b>1.200</b> | <b>0.821</b> |              | <b>0.10</b> |
|    | PBE           | T                    | -1.973        | 1.834        | 0.730        |              |             |
|    | PBE-D3        |                      | -2.390        | 1.825        | 0.725        |              |             |
| Zn | <b>PBE</b>    | <b>E</b>             | <b>-0.832</b> | <b>1.229</b> | <b>1.110</b> | <b>-0.29</b> |             |
|    | <b>PBE-D3</b> |                      | <b>-1.233</b> | <b>1.239</b> | <b>1.103</b> |              | <b>0.43</b> |
|    | PBE           | H <sub>e</sub>       | -0.695        | 1.358        | 1.004        |              |             |
|    | PBE-D3        |                      | -1.126        | 1.304        | 1.043        |              |             |
|    | PBE           | T                    | -0.484        | 2.024        | 0.663        |              |             |
|    | PBE-D3        |                      | -0.931        | 2.185        | 0.546        |              |             |

**Table S9.** Same as Table S1 for W<sub>2</sub>CO<sub>2</sub> (0001) surface.

| Adatom |               | site           | E <sub>ads</sub> (eV) | h (Å)        | ΔQ (e)       | E <sub>diff</sub> | E <sub>bar</sub> |
|--------|---------------|----------------|-----------------------|--------------|--------------|-------------------|------------------|
| Sc     | <b>PBE</b>    | <b>E</b>       | <b>-5.759</b>         | <b>1.094</b> | <b>1.729</b> | <b>1.64</b>       |                  |
|        | <b>PBE-D3</b> |                | <b>-6.119</b>         | <b>1.087</b> | <b>1.731</b> |                   | <b>0.97</b>      |
|        | PBE           | H <sub>e</sub> | -5.475                | 1.229        | 1.703        |                   |                  |
|        | PBE-D3        |                | -5.798                | 1.227        | 1.700        |                   |                  |
|        | PBE           | T              | -3.550                | 1.941        | 1.272        |                   |                  |
|        | PBE-D3        |                | -3.789                | 1.935        | 1.222        |                   |                  |
| Ti     | <b>PBE</b>    | <b>E</b>       | <b>-5.099</b>         | <b>1.044</b> | <b>1.594</b> | <b>-0.35</b>      |                  |
|        | <b>PBE-D3</b> |                | <b>-5.489</b>         | <b>1.026</b> | <b>1.596</b> |                   | <b>0.91</b>      |
|        | PBE           | H <sub>e</sub> | -5.050                | 1.304        | 1.544        |                   |                  |
|        | PBE-D3        |                | -5.400                | 1.303        | 1.548        |                   |                  |
|        | PBE           | T              | -3.308                | 1.909        | 1.132        |                   |                  |
|        | PBE-D3        |                | -3.622                | 1.905        | 1.123        |                   |                  |

|    |                |                      |               |              |              |              |             |
|----|----------------|----------------------|---------------|--------------|--------------|--------------|-------------|
| V  | PBE            | E                    | -4.926        | 1.228        | 1.440        |              |             |
|    | PBE-D3         |                      | -5.281        | 1.219        | 1.444        |              |             |
|    | <b>PBE</b>     | <b>H<sub>e</sub></b> | <b>-4.964</b> | <b>1.252</b> | <b>1.422</b> | <b>-1.07</b> |             |
|    | <b>PBE-D3</b>  |                      | <b>-5.298</b> | <b>1.251</b> | <b>1.422</b> |              | <b>0.56</b> |
|    | PBE            | T                    | -3.565        | 1.964        | 1.063        |              |             |
|    | PBE-D3         |                      | -3.842        | 1.937        | 0.990        |              |             |
| Cr | PBE            | E                    | -2.678        | 1.402        | 1.192        |              |             |
|    | PBE-D3         |                      | -3.125        | 1.380        | 1.199        |              |             |
|    | <b>PBE</b>     | <b>H<sub>e</sub></b> | <b>-2.686</b> | <b>1.429</b> | <b>1.174</b> | <b>-1.31</b> |             |
|    | <b>PBE-PBE</b> |                      | <b>-3.170</b> | <b>1.422</b> | <b>1.172</b> |              | <b>0.12</b> |
|    | PBE            | T                    | -2.323        | 1.964        | 0.870        |              |             |
|    | PBE-D3         |                      | -2.747        | 1.958        | 0.888        |              |             |
| Mn | <b>PBE</b>     | <b>E</b>             | <b>-2.883</b> | <b>1.223</b> | <b>1.478</b> | <b>-0.98</b> |             |
|    | <b>PBE-D3</b>  |                      | <b>-3.247</b> | <b>1.200</b> | <b>1.488</b> |              | <b>0.35</b> |
|    | PBE            | H <sub>e</sub>       | -2.835        | 1.324        | 1.403        |              |             |
|    | PBE-D3         |                      | -3.185        | 1.323        | 1.403        |              |             |
| Fe | PBE            | E                    | -2.660        | 1.223        | 1.255        |              |             |
|    | PBE-D3         |                      | -3.018        | 1.242        | 1.259        |              |             |
|    | <b>PBE</b>     | <b>H<sub>e</sub></b> | <b>-2.710</b> | <b>1.299</b> | <b>1.223</b> | <b>-2.16</b> |             |
|    | <b>PBE-D3</b>  |                      | <b>-3.087</b> | <b>1.297</b> | <b>1.220</b> |              | <b>0.30</b> |
|    | PBE            | T                    | -1.781        | 1.922        | 0.860        |              |             |
| Co | PBE            | E                    | -2.763        | 1.280        | 1.064        |              |             |
|    | PBE-D3         |                      | -3.073        | 1.264        | 1.066        |              |             |
|    | <b>PBE</b>     | <b>H<sub>e</sub></b> | <b>-2.904</b> | <b>1.239</b> | <b>1.028</b> | <b>-2.37</b> |             |
|    | <b>PBE-D3</b>  |                      | <b>-3.223</b> | <b>1.238</b> | <b>1.023</b> |              | <b>0.32</b> |
|    | PBE            | T                    | -2.047        | 1.867        | 0.853        |              |             |
|    | PBE-D3         |                      | -2.360        | 1.866        | 0.816        |              |             |
| Ni | PBE            | E                    | -2.509        | 1.297        | 0.974        |              |             |
|    | PBE-D3         |                      | -2.858        | 1.281        | 0.976        |              |             |
|    | <b>PBE</b>     | <b>H<sub>e</sub></b> | <b>-2.603</b> | <b>1.253</b> | <b>0.950</b> | <b>-2.27</b> |             |
|    | <b>PBE-D3</b>  |                      | <b>-2.973</b> | <b>1.251</b> | <b>0.948</b> |              | <b>0.17</b> |
|    | PBE            | T                    | -2.079        | 1.851        | 0.780        |              |             |
|    | PBE-D3         |                      | -2.388        | 1.851        | 0.780        |              |             |
| Cu | PBE            | E                    | -1.919        | 1.405        | 0.823        |              |             |
|    | PBE-D3         |                      | -2.269        | 1.379        | 0.798        |              |             |
|    | <b>PBE</b>     | <b>H<sub>e</sub></b> | <b>-1.950</b> | <b>1.370</b> | <b>0.827</b> | <b>-1.53</b> |             |
|    | <b>PBE-D3</b>  |                      | <b>-2.324</b> | <b>1.368</b> | <b>0.829</b> |              | <b>0.09</b> |
|    | PBE            | T                    | -1.711        | 1.859        | 0.761        |              |             |
|    | PBE-D3         |                      | -2.031        | 1.856        | 0.734        |              |             |
| Zn | <b>PBE</b>     | <b>E</b>             | <b>-0.325</b> | <b>1.648</b> | <b>0.802</b> |              |             |
|    | PBE-D3         |                      | -0.650        | 1.630        | 0.802        |              |             |
|    | PBE            | H <sub>e</sub>       | -0.305        | 1.663        | 0.789        | -0.81        |             |
|    | <b>PBE-D3</b>  |                      | <b>-0.666</b> | <b>1.646</b> | <b>0.791</b> |              | <b>0.09</b> |
|    | PBE            | T                    | -0.217        | 2.148        | 0.581        |              |             |
|    | PBE-D3         |                      | -0.651        | 2.225        | 0.532        |              |             |

**Table S10.** The linear regression  $y = a + bx$  parameters and  $R^2$  factor of trends reported in Fig. 6.

| M of MXene | Parameters |      | factor |
|------------|------------|------|--------|
|            | a          | b    | $R^2$  |
| Ti         | -1.33      | 1.26 | 0.42   |
| Zr         | -0.19      | 0.83 | 0.38   |
| Hf         | 0.07       | 0.62 | 0.37   |
| V          | -1.68      | 1.47 | 0.54   |
| Nb         | -1.13      | 1.16 | 0.51   |
| Ta         | -1.05      | 0.92 | 0.52   |
| Cr         | -1.39      | 1.50 | 0.74   |
| Mo         | -1.88      | 1.39 | 0.70   |
| W          | -0.92      | 0.99 | 0.64   |

**Table S11.** Electronic configurations of the transition metal atoms.

| <b>Element</b> | <b>Electronic configuration</b> |
|----------------|---------------------------------|
| Sc             | [Ar] $4s^2 3d^1$                |
| Ti             | [Ar] $4s^2 3d^2$                |
| V              | [Ar] $4s^2 3d^3$                |
| Cr             | [Ar] $4s^1 3d^5$                |
| Mn             | [Ar] $4s^2 3d^5$                |
| Fe             | [Ar] $4s^2 3d^6$                |
| Co             | [Ar] $4s^2 3d^7$                |
| Ni             | [Ar] $4s^2 3d^8$                |
| Cu             | [Ar] $4s^1 3d^{10}$             |
| Zn             | [Ar] $4s^2 3d^{10}$             |
| Zr             | [Kr] $5s^2 4d^2$                |
| Nb             | [Kr] $5s^1 4d^4$                |
| Mo             | [Kr] $5s^1 4d^5$                |
| Hf             | [Xe] $6s^2 5d^2$                |
| Ta             | [Xe] $6s^2 5d^3$                |
| W              | [Xe] $6s^2 5d^4$                |

**Table S12.** Electronegativities of the transition metal atoms.<sup>a</sup>

|        |        |        |
|--------|--------|--------|
| Ti     | V      | Cr     |
| (1.54) | (1.63) | (1.66) |
| Zr     | Nb     | Mo     |
| (1.33) | (1.60) | (2.16) |
| Hf     | Ta     | W      |
| (1.30) | (1.50) | (2.36) |

<sup>a</sup> John Emsley, *The Elements*, 3<sup>rd</sup> Edition. Oxford:Clarendon Press, 1998.
